# Supplementary material
Source: MDPI journal article supplement (https://www.mdpi.com/2297-8739/9/3/70)
Supplement: s1 [file s1]

**Table S1** – Experimental levels and *p-values* obtained in the evaluation of the fractional factorial design implemented for assessing the robustness of the method.

| <b>Variables</b>             | <b>Optimum</b> | <b>-2.5 %<br/>(-1)</b> | <b>+2.5 %<br/>(+1)</b> |
|------------------------------|----------------|------------------------|------------------------|
| Extraction solvent vol. (mL) | 15             | 14.63                  | 15.38                  |
| Extraction time (min)        | 45             | 43.87                  | 46.12                  |
| Volume loaded on SPE (mL)    | 7.5            | 7.31                   | 7.69                   |
| Elution volume (mL)          | 7              | 6.83                   | 7.18                   |

*p values*

|                              |       |       |       |       |       |              |
|------------------------------|-------|-------|-------|-------|-------|--------------|
| Tomato                       | AOH   | ALT   | AME   | TeA   | TEN   | All analytes |
| Extraction solvent vol. (mL) | 0.985 | 0.558 | 0.750 | 0.349 | 0.420 | 0.315        |
| Extraction time (min)        | 0.783 | 0.868 | 0.616 | 0.804 | 0.900 | 0.850        |
| Volume loaded on SPE (mL)    | 0.902 | 0.806 | 0.835 | 0.361 | 0.930 | 0.934        |
| Elution volume (mL)          | 0.905 | 0.644 | 0.469 | 0.221 | 0.460 | 0.604        |

*p values*

|                              |       |       |       |       |       |              |
|------------------------------|-------|-------|-------|-------|-------|--------------|
| Wheat                        | AOH   | ALT   | AME   | TeA   | TEN   | All analytes |
| Extraction solvent vol. (mL) | 0.918 | 0.904 | 0.971 | 0.447 | 0.476 | 0.749        |
| Extraction time (min)        | 0.923 | 0.492 | 0.859 | 0.216 | 0.865 | 0.503        |
| Volume loaded on SPE (mL)    | 0.774 | 0.692 | 0.853 | 0.905 | 0.578 | 0.724        |
| Elution volume (mL)          | 0.565 | 0.813 | 0.145 | 0.675 | 0.769 | 0.684        |

*p values*

|                              |       |       |       |       |       |              |
|------------------------------|-------|-------|-------|-------|-------|--------------|
| Sunflower                    | AOH   | ALT   | AME   | TeA   | TEN   | All analytes |
| Extraction solvent vol. (mL) | 0.800 | 0.843 | 0.704 | 0.354 | 0.938 | 0.860        |
| Extraction time (min)        | 0.320 | 0.599 | 0.798 | 0.181 | 0.304 | 0.933        |
| Volume loaded on SPE (mL)    | 0.612 | 0.443 | 0.824 | 0.476 | 0.653 | 0.337        |
| Elution volume (mL)          | 0.446 | 0.895 | 0.977 | 0.638 | 0.309 | 0.442        |
